# Supplementary material for: Thermal Stability and Non-Linear Optical and Dielectric Properties of Lead-Free K0.5Bi0.5TiO3 Ceramics
Source: MDPI journal article supplement (doi:10.3390/ma17092089), 2024-04-29
Supplement: s1 [file s1]

## Supplementary Materials

# Thermal Stability and Non-Linear Optical and Dielectric Properties of Lead-Free $\text{K}_{0.5}\text{Bi}_{0.5}\text{TiO}_3$ Ceramics

Piotr Czaja <sup>1,\*</sup>, Elżbieta Szostak <sup>2,\*</sup>, Joanna Hetmańczyk <sup>2</sup>, Piotr Zachariasz <sup>3</sup>, Dorota Majda <sup>2</sup>, Jan Suchanicz <sup>4</sup>, Małgorzata Karolus <sup>5</sup>, Dariusz Bochenek <sup>5</sup>, Katarzyna Osinska <sup>5</sup>, Jarosław Jędryka <sup>6</sup>, Andriy Kityk <sup>6</sup> and Michał Piasecki <sup>7</sup>

<sup>1</sup> Institute of Technology, University of the National Education Commission, Podchorążych 2, 30-084 Krakow, Poland

<sup>2</sup> Faculty of Chemistry, Jagiellonian University, Gronostajowa 2, 30-387 Krakow, Poland; joanna.hetmanczyk@uj.edu.pl (J.H.); majda@chemia.uj.edu.pl (D.M.)

<sup>3</sup> Center for Hybrid Microelectronics and LTCC, Łukasiewicz Research Network—Institute of Microelectronics and Photonics, Zabłocie 39, 30-701 Krakow, Poland; piotr.zachariasz@imif.lukasiewicz.gov.pl

<sup>4</sup> Department of Mechanical Engineering and Agrophysics, University of Agriculture in Krakow, Balicka 120, 31-120 Krakow, Poland; jan.suchanicz@urk.edu.pl

<sup>5</sup> Faculty of Science and Technology, Institute of Materials Engineering, University of Silesia in Katowice, 75 Pułku Piechoty 1a, 41-500 Chorzow, Poland; malgorzata.karolus@us.edu.pl (M.K.); dariusz.bochenek@us.edu.pl (D.B.); katarzyna.osinska@us.edu.pl (K.O.)

<sup>6</sup> Faculty of Electrical Engineering, Czestochowa University of Technology, Armii Krajowej 17, 42-201 Czestochowa, Poland; jaroslaw.jedryka@pcz.pl (J.J.); andriy.kityk@univie.ac.at (A.K.)

<sup>7</sup> Institute of Physics, Jan Dlugosz University, Armii Krajowej 13/15, 42-200 Czestochowa, Poland; m.piasecki@ujd.edu.pl

\* Correspondence: piotr.czaja@up.krakow.pl (P.C.); szostak@chemia.uj.edu.pl (E.S.)

## A. Thermal stability

The chemical stability of the  $\text{K}_2\text{CO}_3$ ,  $\text{TiO}_2$ , and  $\text{Bi}_2\text{O}_3$  precursors was examined before synthesizing  $\text{K}_{0.5}\text{Bi}_{0.5}\text{TiO}_3$  ceramics. Thermogravimetric analysis showed that titanium (IV) and bismuth (III) oxides are stable in the temperature range of  $25 \div 1000$  °C, while potassium carbonate starts to release the absorbed water molecules at 100 °C (Figure S1). Heating anhydrous  $\text{K}_2\text{CO}_3$  above 800 °C enforces its decomposition, which is still incomplete at 1000 °C. The  $\text{K}_2\text{CO}_3$  findings are consistent with the literature reports [S1, S2], indicating the potassium carbonate decomposition temperature under air is about  $891 \div 896$  °C and strongly depends on the heating rate. Thus, the TG analysis was considered when fixing the synthesis conditions of KBT ceramics.

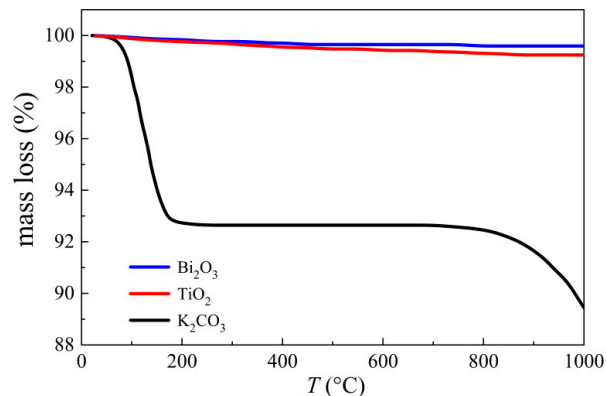

**Figure S1.** Thermogravimetric analysis of  $\text{K}_2\text{CO}_3$ ,  $\text{TiO}_2$ , and  $\text{Bi}_2\text{O}_3$  at ambient conditions.

### B. Structural characterization

Figure S2 shows the X-ray diffraction patterns for precursors in the  $2\theta$  range of  $20^\circ \div 60^\circ$ . XRD data matches the following crystallographic cards: ICDD PDF4+; 00-004-0477 for  $\text{TiO}_2$ , ICDD PDF4+; 01-072-0398 for  $\text{Bi}_2\text{O}_3$ , and ICDD PDF4+; 04-014-3875 for  $\text{K}_2\text{CO}_3$ , respectively.

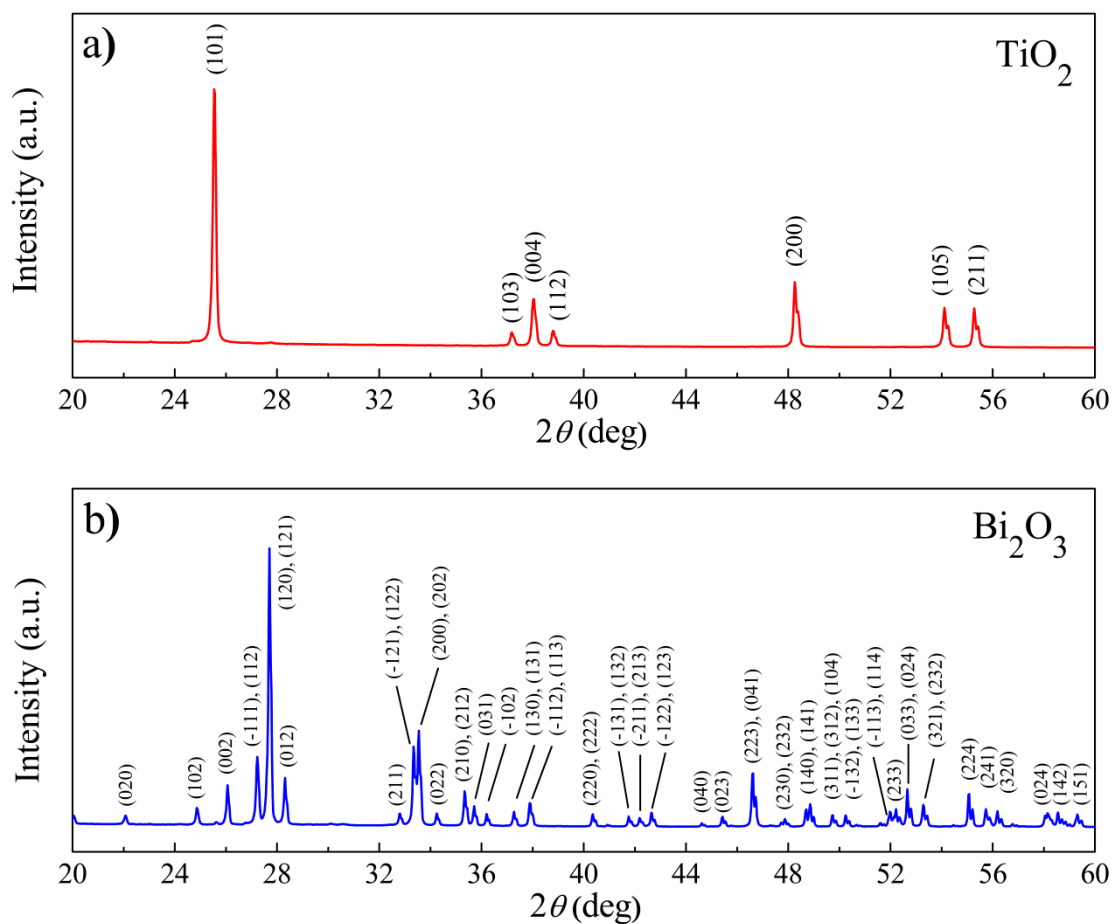

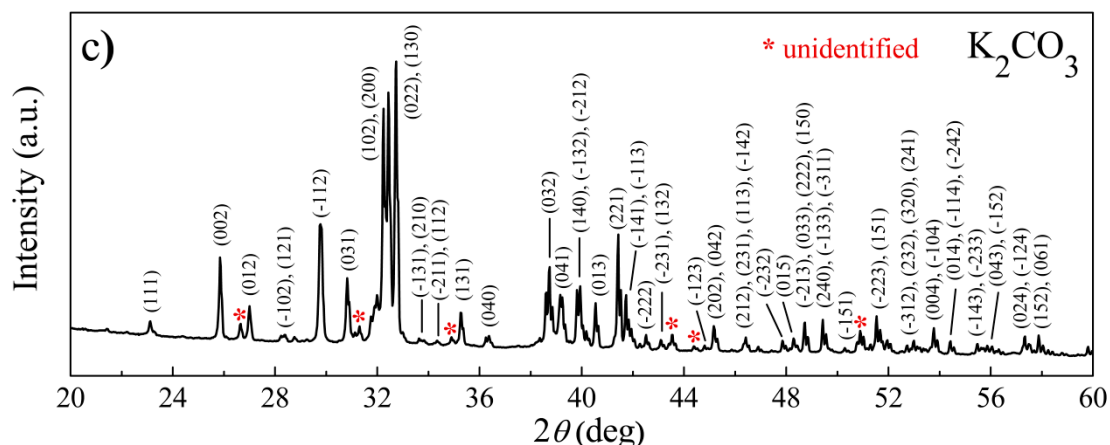

**Figure S2.** X-ray diffraction patterns of (a) tetragonal  $\text{TiO}_2$  and monoclinic (b)  $\text{Bi}_2\text{O}_3$ , (c)  $\text{K}_2\text{CO}_3$  precursors.

X-ray diffraction patterns collected for  $\text{TiO}_2$  (Fig. S2a) and  $\text{Bi}_2\text{O}_3$  (Fig. S2b) precursors show pure phases; nevertheless, it is possible to recognize some unknown lines for  $\text{K}_2\text{CO}_3$  (Fig. S2c). These results should be considered when fabricating KBT since a foreign admixture can modify calcined or sintering temperature.

### C. Optical vibrational spectroscopy

**Table S1.** Experimental and theoretical vibrational bands for 2x2x2 supercell of KBT.

| Experiment                             |                                        | DFT calculations           |       |     |       |                                        |                                        | Remarks                                                               |
|----------------------------------------|----------------------------------------|----------------------------|-------|-----|-------|----------------------------------------|----------------------------------------|-----------------------------------------------------------------------|
| $\nu_{\text{IR}}$ [ $\text{cm}^{-1}$ ] | $\nu_{\text{RS}}$ [ $\text{cm}^{-1}$ ] | $\nu$ [ $\text{cm}^{-1}$ ] |       |     |       | $\nu_{\text{IR}}$ [ $\text{cm}^{-1}$ ] | $\nu_{\text{RS}}$ [ $\text{cm}^{-1}$ ] |                                                                       |
| 819                                    | 819                                    | 816                        | 812   | 802 | 802   | 748                                    | 803                                    | $\nu_s(\text{Ti-O})$ stretching                                       |
| 656                                    | 638                                    | 698                        | 698   | 618 | 609   |                                        | 699<br>618                             | $\alpha(\text{O-Bi-O})$ wagging<br>$\nu_s(\text{Ti-O-Ti})$ stretching |
| 564                                    |                                        | 595                        | 588   | 588 | 579   | 579                                    | 578<br>507                             | $\nu_{\text{as}}(\text{Ti-O-Ti})$<br>$\nu_s$ stretching               |
| 540                                    | 528                                    | 540                        | 533   | 508 | 508   | 503                                    | 496<br>491                             | $\delta(\text{O-Ti-O})$ bending<br>deformation modes                  |
|                                        |                                        | 464                        | 462   | 447 | 447   | 444                                    | 438<br>438                             | $\nu_{\text{as}}(\text{Ti-O-Ti})$<br>$\nu_s$ stretching               |
| 410                                    |                                        | 404                        | 401   | 401 | 400   | 384                                    | 383                                    | skeletal bending<br>deformations                                      |
| 389                                    |                                        | 383                        | 372   |     |       |                                        | 358                                    |                                                                       |
|                                        | 343                                    | 367                        | 367   | 360 |       |                                        |                                        |                                                                       |
|                                        |                                        | 348                        | 348   | 344 | 344   | 343                                    | 342                                    |                                                                       |
|                                        |                                        | 333                        | 333   | 332 | 322.7 | 327.1                                  | 301                                    |                                                                       |
|                                        |                                        | 327                        | 327   |     |       |                                        |                                        |                                                                       |
| 324                                    |                                        | 308                        | 304   | 300 | 300   | 299.7                                  | 303                                    | skeletal bending<br>deformations                                      |
|                                        |                                        | 295                        | 295   | 295 | 282   | 275                                    | 271                                    |                                                                       |
|                                        |                                        | 266                        | 261   | 256 | 256   | 255                                    |                                        |                                                                       |
| 275                                    | 273                                    | 240                        | 231   | 230 | 230   |                                        | 230                                    | skeletal bending<br>deformations                                      |
| 228                                    |                                        | 183                        | 183   | 180 | 174   | 174                                    | 170                                    | torsion modes                                                         |
|                                        |                                        | 169                        | 168.6 | 168 | 168   | 166                                    |                                        |                                                                       |
|                                        |                                        | 163                        | 162   | 162 | 159   |                                        |                                        |                                                                       |
|                                        | 206                                    | 207                        | 204   | 201 | 201   | 197                                    | 197                                    | torsion modes                                                         |
| 195                                    |                                        |                            |       |     |       |                                        |                                        |                                                                       |
|                                        | 142                                    | 149                        | 149   | 148 | 147   | 143                                    | 143                                    |                                                                       |
|                                        |                                        | 116                        |       |     |       |                                        | 114                                    |                                                                       |

|    |                         |     |                           |
|----|-------------------------|-----|---------------------------|
|    | 108 108 103 91 86 84 84 | 107 | lattice modes ( $\nu_L$ ) |
| 66 | 57 57 47 47             |     |                           |
|    | 0 0 0                   |     | acoustic modes            |

---

## References

- [S1] Zhang, J.; Qi, M.; Zhang, G.; Hu, H.; Xie, L.; Ma, X. Co - production of hydrogen and fibrous carbons by methane decomposition using  $K_2CO_3$ /carbon hybrid as the catalyst, *International Journal of Hydrogen Energy* **2017**, 42, 11047 – 11052, <https://doi.org/10.1016/j.ijhydene.2017.03.113>.
- [S2] Lehman, R.L.; Gentry, J.S.; Glumac, N.G. Thermal stability of potassium carbonate near its melting point, *Thermochimica Acta* **1998**, 316(1), 1 – 9, [https://doi.org/10.1016/S0040-6031\(98\)00289-5](https://doi.org/10.1016/S0040-6031(98)00289-5).
